# Supplementary material
Source: PubMed Central journal article supplement (PMC4306520)
Supplement: jm501543u_si_001.pdf [file jm501543u_si_001.pdf]

**Supplemental Table S1: Top-Scoring FDA-Approved Drugs**

| Drugs | Names             | Structures                                                                          | Uses                                             | AMBER Scores (kcal/mol) | In-Silico Rankings |
|-------|-------------------|-------------------------------------------------------------------------------------|--------------------------------------------------|-------------------------|--------------------|
| 1     | Cefotiam          | 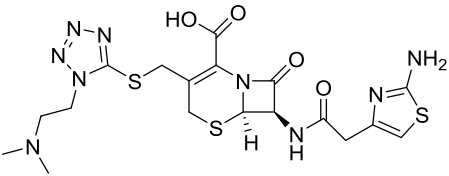   | Cephalosporin antibiotic                         | -41.201                 | 1                  |
| 2     | Roli-tetracycline |    | Tetracycline antibiotic                          | -9.602                  | 24                 |
| 3     | Benidipine        |    | Ca <sup>+</sup> channel blocker for hypertension | -21.671                 | 16                 |
| 4     | Cisapride         |   | Gastroprokinetic agent                           | -23.399                 | 15                 |
| 5     | Dantrolene        |  | Muscle relaxant                                  | -39.587                 | 3                  |
| 6     | Nizatidine        |  | H <sub>2</sub> receptor agonist for acid reflux  | -40.980                 | 2                  |
| 7     | Bisoprolol        |  | Beta blocker                                     | -37.168                 | 4                  |
| 8     | Valacyclovir      |  | Antiviral for herpes treatment                   | -23.795                 | 13                 |

|    |                      |  |                                                         |         |    |
|----|----------------------|--|---------------------------------------------------------|---------|----|
| 9  | Pantoprazole         |  | Proton pump inhibitor for acid reflux                   | -19.377 | 19 |
| 10 | Acitretin            |  | Retinoid for psoriasis treatment                        | -17.884 | 20 |
| 11 | Oxybutynin           |  | Anticholinergic for frequent urination                  | -11.123 | 22 |
| 12 | Pentamidine          |  | Antimicrobial                                           | -10.383 | 23 |
| 13 | Furaltadone          |  | Antibiotic                                              | -32.090 | 6  |
| 14 | Butacaine            |  | Local anesthetic                                        | -32.215 | 5  |
| 15 | Bifonazole           |  | Imidazole antifungal                                    | -30.647 | 7  |
| 16 | 13-cis-retinoic acid |  | Accutane, acne treatment                                | -30.110 | 8  |
| 17 | Gabexate             |  | Serine protease inhibitor for treatment of pancreatitis | -29.313 | 9  |
| 18 | Sulcotidil           |  | Vasodilator                                             | -26.382 | 11 |

|    |             |                                                                                     |                                   |         |    |
|----|-------------|-------------------------------------------------------------------------------------|-----------------------------------|---------|----|
| 19 | Capsaicin   | 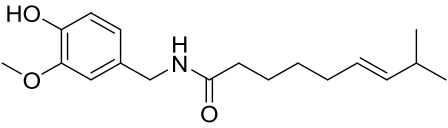   | Active component of chili peppers | -25.876 | 12 |
| 20 | Pramoxine   |    | Topical anesthetic                | -23.735 | 14 |
| 21 | Midodrine   |    | Vasopressor/<br>Antihypertension  | -19.520 | 18 |
| 22 | Metoprolol  |    | Beta blocker                      | -15.643 | 21 |
| 23 | Glipizide   |    | Anti-diabetic                     | -6.506  | 25 |
| 24 | Fenofibrate |   | Cholesterol lowering drug         | -26.537 | 10 |
| 25 | Bezafibrate |  | Cholesterol lowering drug         | -21.133 | 17 |
