# Supplementary material
Source: PubMed Central journal article supplement (PMC4306520)
Supplement: jm501543u_si_003.pdf [file jm501543u_si_003.pdf]

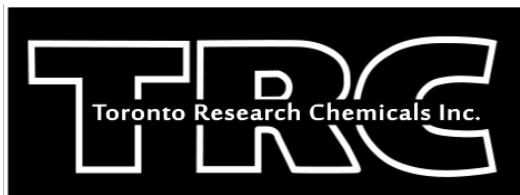

# CERTIFICATE OF ANALYSIS

2 Brisbane Road, North York, ON m3j 2j8, Canada

Tel: (416) 665-9696, Fax: (416) 665-4439

E-mail: torresch@interlog.com

Website: www.torontoresearchchemicals.com

## 1. Identification

**CAS Number:** 138786-67-1

**Cat. Number:** P183000

**Product:** Pantoprazole Sodium Salt

**Synonym:** 6-(Difluoromethoxy)-2-[[[(3,4-dimethoxy-2-pyridinyl)methyl]sulfinyl]-1H-benzimidazole Sodium Salt; 5-(Difluoromethoxy)-2-[[[(3,4-dimethoxy-2-pyridinyl)methyl]sulfinyl]-1H-benzimidazole Sodium Salt; C

**Structure:**

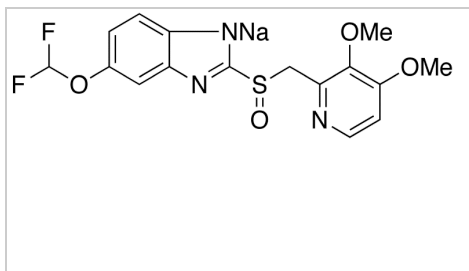

**Molecular Formula:**

C<sub>16</sub>H<sub>15</sub>F<sub>2</sub>N<sub>3</sub>NaO<sub>4</sub>S

**Molecular weight:**

405.35

**Source of Product:**

## 2. Analytical Information

**Lot Number:** 1-SWM-19-1

**Boiling Point:** N/A

**Melting Point:** 151-155°C

**Atmosphere:** Inert Gas

**Appearance:** White to Off-White S

**Solubility:** Methanol, Water

**Method for Determining Identity:** 1H NMR (D<sub>2</sub>O) Spectroscopic and Mass Spectrometric Analysis

**Stability:** Not determined

**Purity:** 98%

**Long Term Storage Condition:** -20°C Freezer, Under inert atmosphere

**Additional Info.:** TLC Conditions: SiO<sub>2</sub>: Dichloromethane: Methanol = 9: 1; Visualized with UV and AMCS; Single spot; R<sub>f</sub> = 0.5. 1H NMR and mass conform to structure. Sodium content: 6.0% Water Content (by Karl Fischer): 5.8%.

Philip Chan, Head of Quality Assurance

**QC Test Date:**

1/3/2012 (MM/DD/YYYY)

**Retest Date:**

1/3/2017 (MM/DD/YYYY)

1-SWM-19-1 D2O

NAME 1-SWM-19-1, Dec 2011  
 EXPNO 1  
 PROCNO 1  
 Date\_ 20111222  
 Time 15:37  
 INSTRUM spect  
 PULPROG zgpg30  
 TD 32768  
 SOLVENT D2O  
 NS 8  
 DS 2  
 SWH 7211.535 Hz  
 FIDRES 0.220079 Hz  
 AQ 2.2719646 sec  
 RG 203  
 DW 69.333 usec  
 DE 298.2 usec  
 DI 1.0000000 sec  
 TDO 1

===== CHANNEL f1 =====  
 NUC1 <sup>1</sup>H  
 P1 13.70 usec  
 PL1 -1.00 dB  
 PL1W 10.97310352 W  
 SFO1 400.1528010 MHz  
 SI 32768  
 SF 400.1500000 MHz  
 WDW EM  
 SSB 0  
 LB 0.30 Hz  
 GB 0  
 PC 1.00

15 14 13 12 ppm

8.120  
 7.652  
 7.458  
 7.458  
 7.453  
 7.074  
 7.068  
 7.052  
 7.046  
 7.042  
 7.027  
 6.986  
 6.799  
 6.612

1.000  
 1.013  
 0.945  
 2.041  
 0.253  
 0.488  
 0.251

4.830  
 4.798  
 4.796  
 4.788  
 4.780  
 4.676  
 4.644

0.654  
 0.953

3.899  
 3.684  
 3.679

3.067  
 3.008

10 9 8 7 6 5 4 3 2 1 0 ppm

1-SWM-19-1 (vial) D2O

```

NAME      1-SWM-19-1 Dec 2011
EXPNO     1
PROCNO    1
Date_     20111223
Time      10.44
INSTRUM   spect
PROBHD    5 mm PABBO RE-
PULPROG   zg30
TD         32768
SOLVENT   D2O
NS         8
DS         1
SWH        7211.539 Hz
FIDRES     0.220079 Hz
AQ         2.2719646 sec
RG         203
DW         69.333 usec
DE         6.50 usec
TE         298.3 K
D1         1.00000000 sec
TD0        1
===== CHANNEL f1 =====
NUC1       1H
P1         13.70 usec
PL1        -1.00 dB
PL12       10.97310352 W
SFO1       400.1528010 MHz
SI         32768
SF         400.1500000 MHz
WDW        EM
SSB        0
LB         0.30 Hz
GB         0
FC         1.00
  
```

4.835  
4.803  
4.787  
4.688  
4.656

8.121  
7.656  
7.634  
7.461  
7.456  
7.086  
7.080  
7.063  
7.058  
7.051  
7.036  
6.990  
6.803  
6.617

3.904  
3.687

14 13 12 ppm

1.000  
0.991  
0.928  
2.091  
0.242  
0.457  
0.240

0.743  
1.192  
2.919  
2.951

10 9 8 7 6 5 4 3 2 1 0 ppm

1-SWM-19-1

1-SWM-19-1 67 (3.486) Sm (Mn, 1x0.50); Cm (67.68-1:6)  
406.03

Scan ES+  
7.44e7

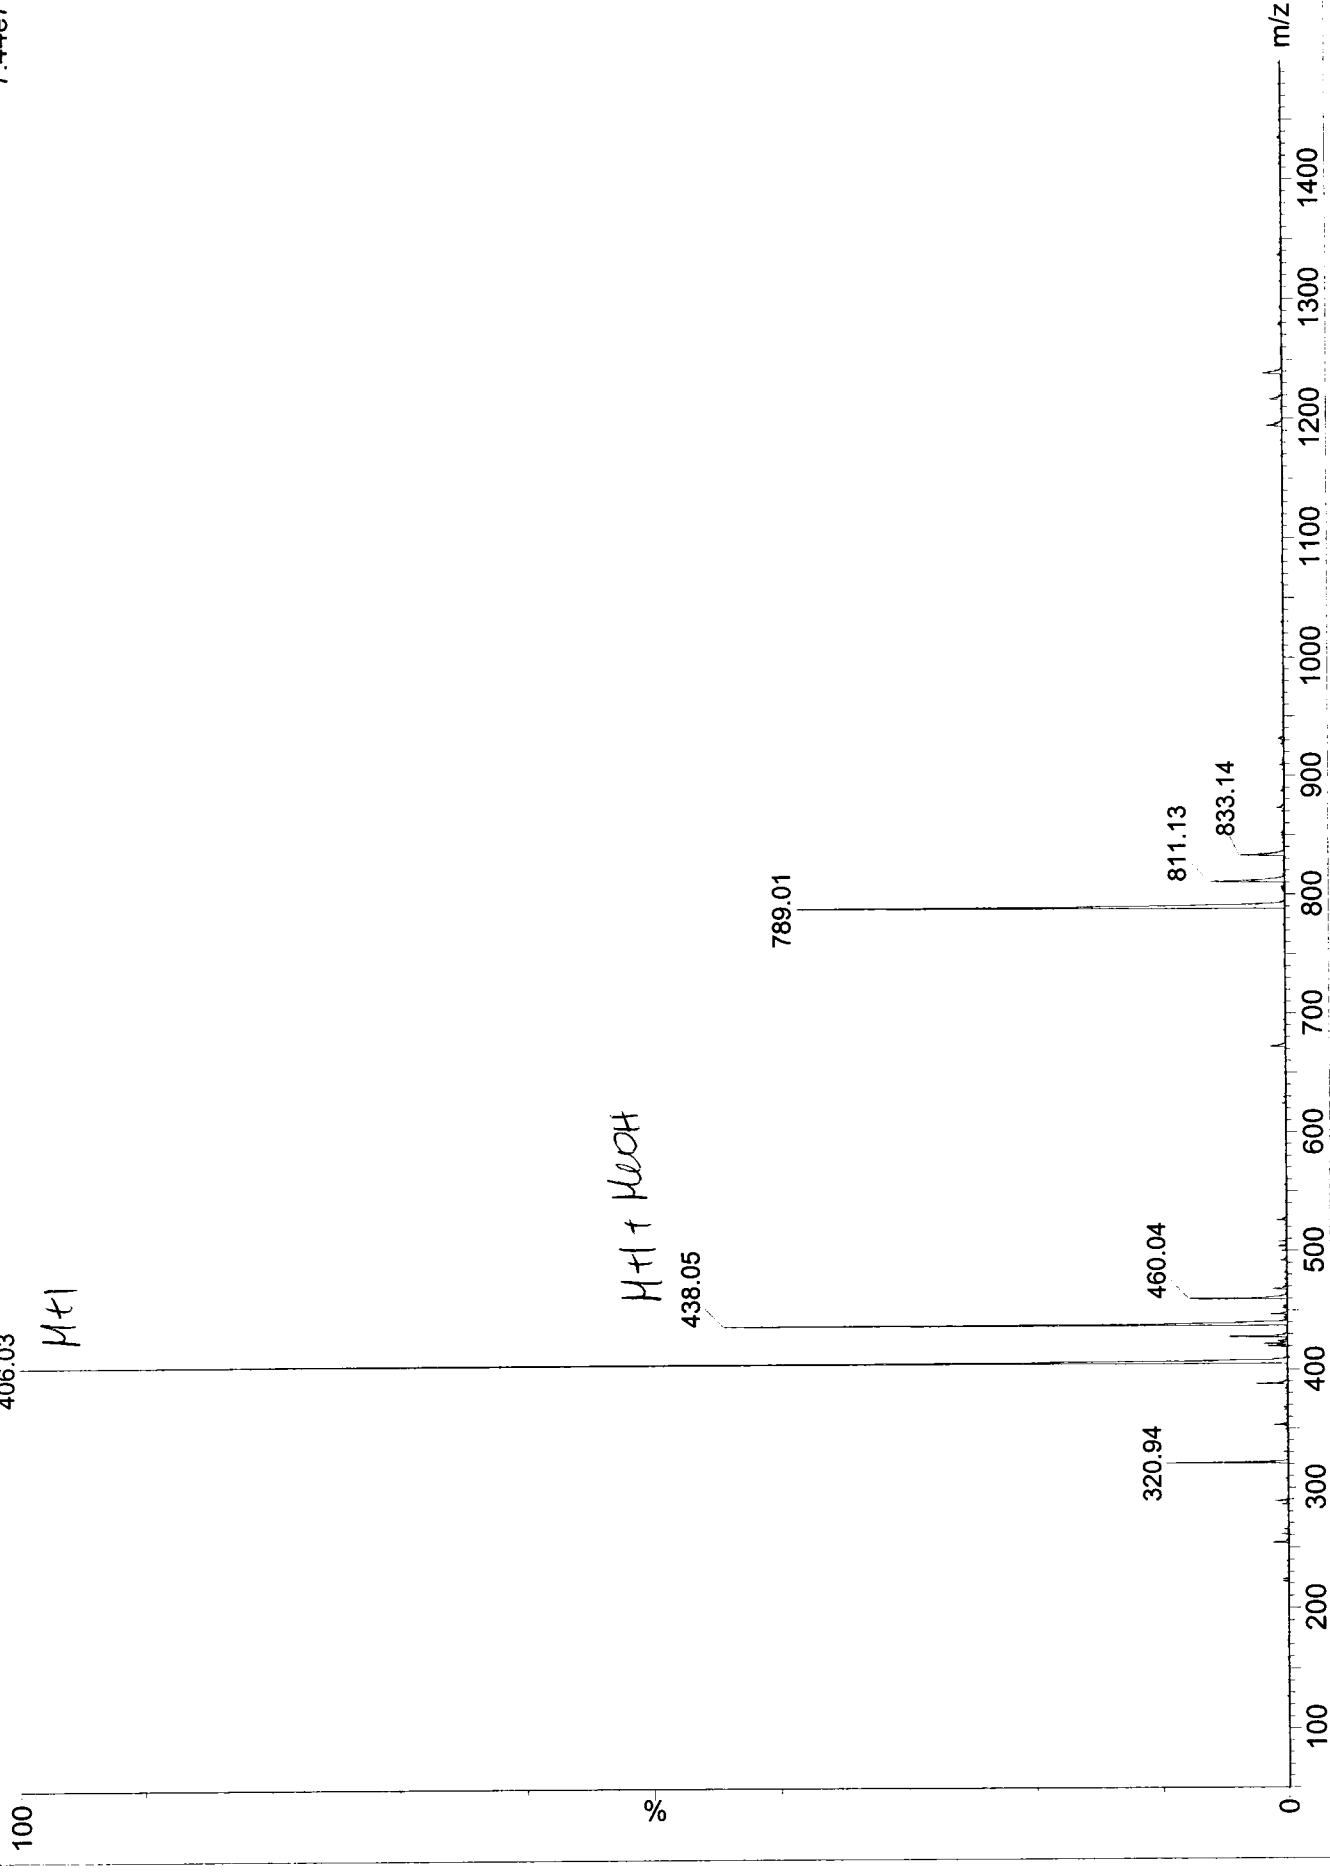

**1-SWM-19-1**  
1-SWM-19-1 57 (2.967) Sm (Mn, 1x0.50); Cm (55:57-10:15)  
229.97

Scan ES+  
1.04e8

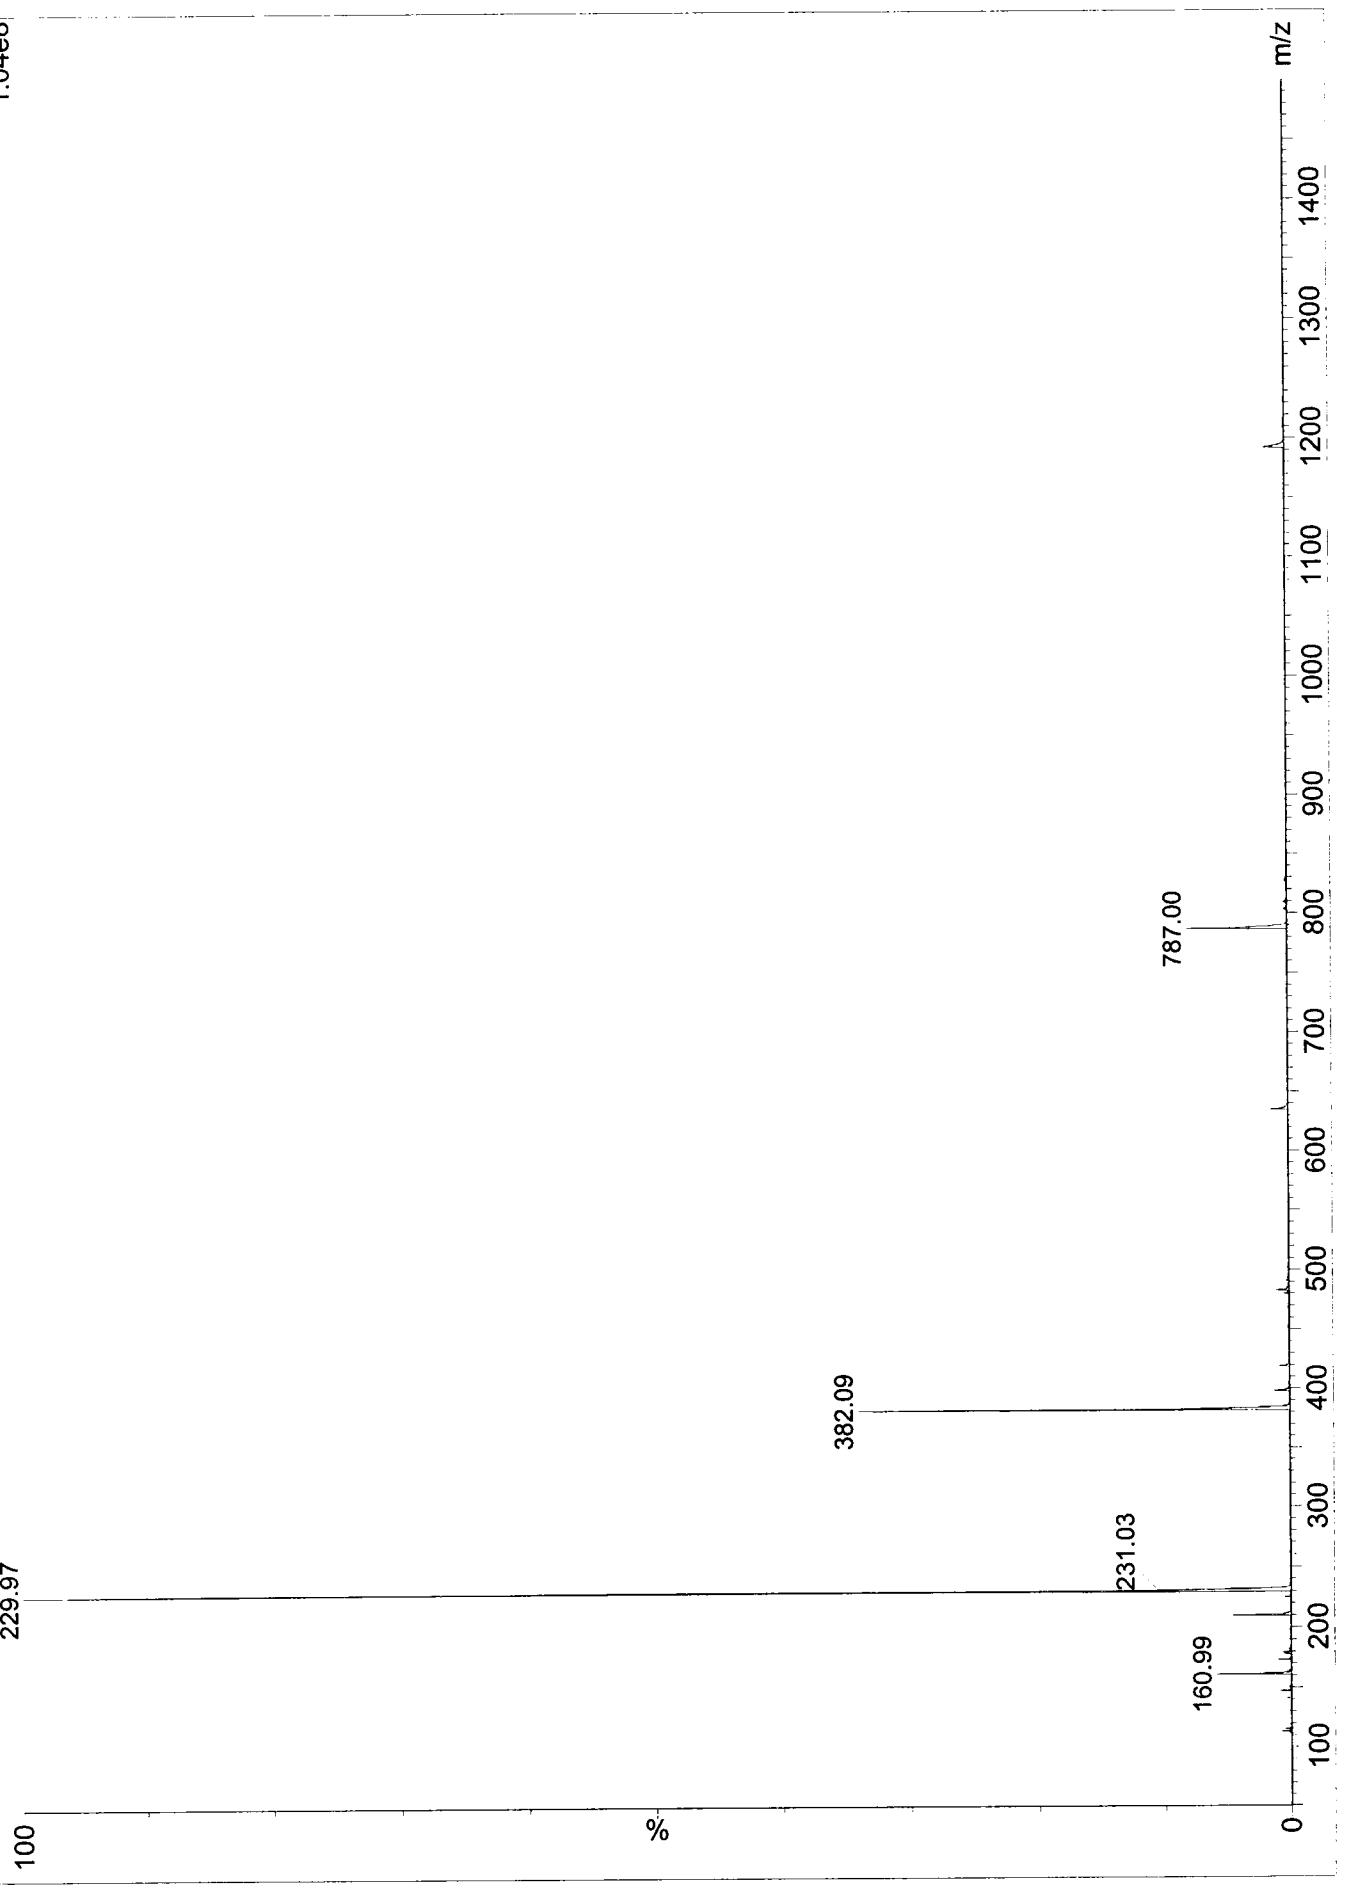

## Certificate of Analysis

**Product Name:** LANSOPRAZOLE  
>= 98 % TLC, powder  
**Product Number:** L8533  
**Product Brand:** Sigma  
**Molecular Formula:** C<sub>16</sub>H<sub>14</sub>F<sub>3</sub>N<sub>3</sub>O<sub>2</sub>S  
**Molecular Mass:** 369.36  
**CAS Number:** 103577-45-3

| TEST                   | SPECIFICATION          | LOT BCBC8368V RESULTS                   |
|------------------------|------------------------|-----------------------------------------|
| APPEARANCE (COLOR)     | WHITE TO PINK          | ALMOST WHITE                            |
| APPEARANCE (FORM)      | POWDER                 | POWDER                                  |
| PURITY (TLC AREA %)    | ≥ 98.0 %               | 100.0 %                                 |
| SOLUBILITY (COLOR)     | FAINT YELLOW TO PINK   | LIGHT YELLOW TO LIGHT YELLOW-<br>-BROWN |
| SOLUBILITY (TURBIDITY) | CLEAR TO SLIGHTLY HAZY | CLEAR (<3.5 NTU)                        |
| SOLUBILITY (METHOD)    | 25 MG/ML, MEOH         | --                                      |
| CARBON CONTENT         | 50.7 - 53.3 %          | 51.96 %                                 |
| HYDROGEN CONTENT       | 3.52 - 4.12            | 4.07 %                                  |
| NITROGEN CONTENT       | 11.0 - 11.7 %          | 11.57%                                  |

**QC RELEASE DATE** 13/AUG/10  
**RECOMMENDED RETEST DATE** JUL/14



Edeltraud Schwärzler, Manager  
Quality Control  
Buchs, Switzerland

Sigma-Aldrich warrants, that its products conform to the information contained in this and other Sigma-Aldrich publications. Purchaser must determine the suitability of the product for its particular use. See reverse side of invoice for additional terms and conditions of sale. The values given on the 'Certificate of Analysis' are the results determined at the time of analysis.

## Certificate of Analysis

**Product Name:** OMEPRAZOLE  
solid  
**Product Number:** O104  
**Product Brand:** Sigma  
**Molecular Formula:** C<sub>17</sub>H<sub>19</sub>N<sub>3</sub>O<sub>3</sub>S  
**Molecular Mass:** 345.42  
**CAS Number:** 73590-58-6

| TEST                   | SPECIFICATION             | LOT BCBF7621V RESULTS |
|------------------------|---------------------------|-----------------------|
| APPEARANCE (COLOR)     | WHITE TO OFF-WHITE        | WHITE                 |
| APPEARANCE (FORM)      | POWDER                    | POWDER                |
| PURITY (HPLC AREA %)   | ≥ 98.0 %                  | 99.7 %                |
| SOLUBILITY (COLOR)     | COLORLESS TO FAINT YELLOW | COLORLESS             |
| SOLUBILITY (TURBIDITY) | CLEAR (< 3.5 NTU)         | CLEAR (<3.5 NTU)      |
| SOLUBILITY (METHOD)    | 5 MG/ML IN ETHANOL        | --                    |
| CARBON CONTENT         | 57.6 - 60.6 %             | 59.04 %               |
| NITROGEN CONTENT       | 11.8 - 12.6 %             | 12.11 %               |
| INFRARED SPECTRUM      | CONFORMS TO STRUCTURE     | CONFORMS              |

**QC RELEASE DATE** 23/MAY/11



Edeltraud Schwärzler, Manager  
Quality Control  
Buchs, Switzerland

Sigma-Aldrich warrants, that its products conform to the information contained in this and other Sigma-Aldrich publications. Purchaser must determine the suitability of the product for its particular use. See reverse side of invoice for additional terms and conditions of sale. The values given on the 'Certificate of Analysis' are the results determined at the time of analysis.

3050 Spruce Street, Saint Louis, MO 63103, USA

Website: www.sigmaaldrich.com

Email USA: techserv@sial.com

Outside USA: eurtechserv@sial.com

## Certificate of Analysis

Product Name:

Rabeprazole sodium - ≥98% (HPLC)

**Product Number:** SML0476  
**Batch Number:** 092M4709V  
**Brand:** SIGMA  
**CAS Number:** 117976-90-6  
**Formula:** C<sub>18</sub>H<sub>20</sub>N<sub>3</sub>O<sub>3</sub>S · Na  
**Formula Weight:** 381.42 g/mol  
**Storage Temperature:** Store at -20 °C  
**Quality Release Date:** 24 OCT 2012

| Test                                                                                       | Specification  | Result    |
|--------------------------------------------------------------------------------------------|----------------|-----------|
| Appearance (Color)                                                                         | White to Beige | White     |
| Appearance (Form)                                                                          | Powder         | Powder    |
| Elemental Composition<br>C <sub>18</sub> H <sub>20</sub> N <sub>3</sub> O <sub>3</sub> SNa | Pass           | Pass      |
| ELEMENTAL ANALYSIS X VALUE<br>H <sub>2</sub> O                                             | 0.0 - 4.0      | 1.3       |
| Purity (HPLC)                                                                              | ≥ 98 %         | 100 %     |
| Identity                                                                                   | Confirmed      | Confirmed |



Brendan Nye, QC Team Leader  
Quality Control  
Natick, Massachusetts US

Sigma-Aldrich warrants, that at the time of the quality release or subsequent retest date this product conformed to the information contained in this publication. The current Specification sheet may be available at Sigma-Aldrich.com. For further inquiries, please contact Technical Service. Purchaser must determine the suitability of the product for its particular use. See reverse side of invoice or packing slip for additional terms and conditions of sale.
